# Supplementary material for: Increasing forest disturbance enhances habitat suitability for Europe’s large herbivores
Source: Research Square preprint supplement (doi:10.21203/rs.3.rs-7824896/v1), 2025-10-17
Supplement: Supplementary file 1 [file eb8c44a807dc7d8536027b87.docx]

## Supplementary Note S1: Environmental clustering of animals

We clustered animals into environmental clusters per species based on a sample of tracking locations of up to 1000 points per animal. As clustering variables, we used a subset of our environmental predictors that characterize land cover, climate, topography, and human pressure (forest cover, mean temperature of the coldest quarter, terrain ruggedness, and human population density). To further reduce dimensionality, we applied a principal component analysis (PCA) and used the first two components as input variables for the clustering. These PC components explained 97% of the observed variance for European bison, 99% for moose, 99% for red deer, and 98% for roe deer. Then, we applied size-constrained clustering using the R package *scclust*50. We defined the minimum cluster size as ⅛ of animals available per species and used the first two components of our PCA analysis for calculating distances between data points (i.e., animals). The algorithm implemented in the *scclust* package clusters data points using a graph-based approach to minimize within-cluster dissimilarities while ensuring that each cluster contains at least a certain number of points.
